# Supplementary material for: Cost-Utility Analysis of Non-Contrast Abbreviated Magnetic Resonance Imaging for Hepatocellular Carcinoma Surveillance in Cirrhosis
Source: PubMed Central journal article supplement — Gut Liver. 2023 Aug 10;18(1):135–46. doi: 10.5009/gnl230089 (PMC10791494; doi:10.5009/gnl230089), 2023-08-10
Supplement: gnl-18-1-135-supple.pdf [file gnl-18-1-135-supple.pdf]

**Supplementary Table 1.** Detailed Costs, Proportions of HCC Treatments, Transition Probabilities, and Recurrence Rates after HCC Treatments

| Parameter                                                                   | Thailand               | USA    | Reference                     |
|-----------------------------------------------------------------------------|------------------------|--------|-------------------------------|
| <b>Monitoring and maintenance costs</b>                                     |                        |        |                               |
| Laboratory investigations (per visit)                                       | 20                     |        | KCMH                          |
| Surveillance esophagogastroduodenoscopy                                     | 120                    |        | KCMH                          |
| Extra post-procedure surveillance MRI screening (per yr)                    | 465                    |        |                               |
| Admission due to complications of cirrhosis (per admission)                 | 519                    |        | Ref <sup>1</sup>              |
| Post-transplantation                                                        | 3,025                  | 49,906 | Ref <sup>2,3</sup>            |
| <b>Annual direct non-medical costs, \$</b>                                  |                        |        |                               |
| Compensated cirrhosis                                                       | 127                    |        | Ref <sup>4</sup>              |
| Decompensated cirrhosis                                                     | 176                    |        | Ref <sup>4</sup>              |
| Hospital visit, outpatient service (per visit)                              | 20                     |        | Ref <sup>4</sup>              |
| <b>Proportion of initial treatments</b>                                     |                        |        |                               |
| Transplantation in early HCC                                                | 0.13                   | 0.14   | KCMH, Ref <sup>5-8</sup>      |
| Resection in early HCC                                                      | 0.38                   | 0.24   | KCMH, Ref <sup>5-8</sup>      |
| RFA in early HCC                                                            | 0.23                   | 0.20   | KCMH, Ref <sup>5-8</sup>      |
| TACE in early HCC                                                           | 0.22                   | 0.33   | KCMH, Ref <sup>5-8</sup>      |
| Best supportive care in early HCC                                           | 0.04                   | 0.09   | KCMH, Ref <sup>5-8</sup>      |
| Resection in advanced HCC                                                   | 0.24                   | 0.09   | KCMH, Ref <sup>5-9</sup>      |
| RFA in advanced HCC                                                         | 0.03                   | 0.08   | KCMH, Ref <sup>5-9</sup>      |
| TACE in advanced HCC                                                        | 0.50                   | 0.45   | KCMH, Ref <sup>5-9</sup>      |
| Sorafenib in advanced HCC                                                   | 0.04                   | 0.01   | KCMH, Ref <sup>5-9</sup>      |
| Atezolizumab/bevacizumab in advanced HCC                                    | 0.01                   | 0.13   | KCMH, Ref <sup>5-9</sup>      |
| Best supportive care in advanced HCC                                        | 0.18                   | 0.24   | KCMH, Ref <sup>5-9</sup>      |
| <b>Proportion of alternative treatment options for sensitivity analysis</b> |                        |        |                               |
| Transplantation in early HCC                                                | 0.12                   | 0.11   | KCMH, Ref <sup>5,6,8</sup>    |
| Resection in early HCC                                                      | 0.34                   | 0.21   | KCMH, Ref <sup>5,6,8</sup>    |
| RFA in early HCC                                                            | 0.21                   | 0.21   | KCMH, Ref <sup>5,6,8</sup>    |
| TACE in early HCC                                                           | 0.20                   | 0.30   | KCMH, Ref <sup>5,6,8</sup>    |
| Radioembolization in early HCC                                              | -                      | 0.06   | KCMH, Ref <sup>5,6,8</sup>    |
| External radiation in early HCC                                             | 0.01                   | 0.02   | KCMH, Ref <sup>5,6,8</sup>    |
| Best supportive care in early HCC                                           | 0.03                   | 0.09   | KCMH, Ref <sup>5,6,8</sup>    |
| Resection in advanced HCC                                                   | 0.28                   | 0.09   | KCMH, Ref <sup>5,6,8-10</sup> |
| RFA in advanced HCC                                                         | 0.04                   | 0.10   | KCMH, Ref <sup>5,6,8-10</sup> |
| TACE in advanced HCC                                                        | 0.43                   | 0.36   | KCMH, Ref <sup>5,6,8-10</sup> |
| Radioembolization in advanced HCC                                           | 0.09                   | 0.12   | KCMH, Ref <sup>5,6,8-10</sup> |
| External radiation in advanced HCC                                          | 0.05                   | 0.03   | KCMH, Ref <sup>5,6,8-10</sup> |
| Sorafenib in advanced HCC                                                   | 0.03                   | 0.01   | KCMH, Ref <sup>5,6,8-10</sup> |
| Lenvatinib in advanced HCC                                                  | 0.01                   | 0.01   | KCMH, Ref <sup>5,6,8-10</sup> |
| Atezolizumab/bevacizumab in advanced HCC                                    | 0.01                   | 0.11   | KCMH, Ref <sup>5,6,8-10</sup> |
| Best supportive care in advanced HCC                                        | 0.14                   | 0.18   | KCMH, Ref <sup>5,6,8-11</sup> |
| <b>Annual progression</b>                                                   |                        |        |                               |
| HCC in early cirrhosis                                                      | 0.03                   |        | Ref <sup>12,13</sup>          |
| HCC in late cirrhosis                                                       | 0.09                   |        | Ref <sup>12,13</sup>          |
| Progression to the next ALBI stage                                          | 0.06                   |        | Ref <sup>14</sup>             |
| <b>Annual mortality</b>                                                     |                        |        |                               |
| Age-related mortality rate                                                  | WHO Mortality Database |        | Ref <sup>15</sup>             |
| Early cirrhosis                                                             | 0.013                  |        | Ref <sup>16</sup>             |
| Late cirrhosis                                                              | 0.075                  |        | Ref <sup>16</sup>             |
| Early HCC                                                                   | 0.05                   |        | Ref <sup>17</sup>             |
| Advanced HCC                                                                | 0.96                   |        | Ref <sup>17</sup>             |
| Post-transplantation in early cirrhosis                                     | 0.016                  |        | Ref <sup>18</sup>             |
| Post-transplantation in late cirrhosis                                      | 0.084                  |        | Ref <sup>18</sup>             |
| Post-resection in early cirrhosis                                           | 0.022                  |        | Ref <sup>19</sup>             |
| Post-resection in late cirrhosis                                            | 0.036                  |        | Ref <sup>19</sup>             |
| Post-RFA in early cirrhosis                                                 | 0.01                   |        | Ref <sup>20</sup>             |
| Post-RFA in late cirrhosis                                                  | 0.08                   |        | Ref <sup>20</sup>             |
| Post-TACE in early cirrhosis                                                | 0.22                   |        | Ref <sup>21</sup>             |
| Post-TACE in late cirrhosis                                                 | 0.40                   |        | Ref <sup>21</sup>             |
| Post-radioembolization in early cirrhosis                                   | 0.12                   |        | Ref <sup>22</sup>             |

Supplementary Table 1. Continued

| Parameter                                           | Thailand | USA | Reference            |
|-----------------------------------------------------|----------|-----|----------------------|
| Post-radioembolization in late cirrhosis            | 0.35     |     | Ref <sup>22</sup>    |
| Post-external radiation in early cirrhosis          | 0.10     |     | Ref <sup>23</sup>    |
| Post-external radiation in late cirrhosis           | 0.39     |     | Ref <sup>23</sup>    |
| Post-sorafenib in early cirrhosis                   | 0.42     |     | Ref <sup>24</sup>    |
| Post-sorafenib in late cirrhosis                    | 0.71     |     | Ref <sup>24</sup>    |
| Post-lenvatinib treatment                           | 0.36     |     | Ref <sup>25</sup>    |
| Post-atezolizumab/bevacizumab treatment             | 0.27     |     | Ref <sup>26,27</sup> |
| Recurrence rates after HCC treatments               |          |     |                      |
| Recurrence after transplantation in early cirrhosis | 0.02     |     | Ref <sup>18</sup>    |
| Recurrence after transplantation in late cirrhosis  | 0.082    |     | Ref <sup>18</sup>    |
| Recurrence after resection in early cirrhosis       | 0.08     |     | Ref <sup>19</sup>    |
| Recurrence after resection in late cirrhosis        | 0.09     |     | Ref <sup>19</sup>    |
| Recurrence after RFA in early cirrhosis             | 0.22     |     | Ref <sup>28</sup>    |
| Recurrence after RFA in late cirrhosis              | 0.26     |     | Ref <sup>28</sup>    |
| Recurrence after TACE in early cirrhosis            | 0.38     |     | Ref <sup>29</sup>    |
| Recurrence after TACE in late cirrhosis             | 0.38     |     | Ref <sup>29</sup>    |
| Recurrence after radioembolization treatment        | 0.30     |     | Ref <sup>30</sup>    |
| Recurrence after external radiation treatment       | 0.29     |     | Ref <sup>31</sup>    |
| Proportion of treatment after recurrence            |          |     |                      |
| Resection                                           | 0.16     |     | Ref <sup>32</sup>    |
| RFA                                                 | 0.30     |     | Ref <sup>32</sup>    |
| TACE                                                | 0.26     |     | Ref <sup>32</sup>    |
| Palliative                                          | 0.28     |     | Ref <sup>32</sup>    |

HCC, hepatocellular carcinoma; KCMH, King Chulalongkorn Memorial Hospital; MRI, magnetic resonance imaging; RFA, radiofrequency ablation; TACE, transarterial chemoembolization; ALBI, albumin-bilirubin score; WHO, World Health Organization.

**Supplementary Table 2.** Included Studies in the Systematic Review and Meta-Analysis of the Performance of Ultrasonography with AFP in the Diagnosis of Early and Overall HCC

| Study                                 | Year | Country   | Study type    | Population, n | Sensitivity (95% CI)                                 | Specificity (95% CI)                                 | Reference standard                                    |
|---------------------------------------|------|-----------|---------------|---------------|------------------------------------------------------|------------------------------------------------------|-------------------------------------------------------|
| Mok <i>et al.</i> <sup>33</sup>       | 2005 | Hong Kong | Prospective   | 940           | Overall: 0.72 [0.53–0.86]                            | Overall: 0.92 [0.90–0.94]                            | Pathology, CT                                         |
| Singal <i>et al.</i> <sup>34</sup>    | 2012 | USA       | Prospective   | 442           | Early: 0.63 [0.44–0.80]<br>Overall: 0.90 [0.77–0.97] | Early: 0.83 [0.79–0.87]<br>Overall: 0.83 [0.79–0.87] | Pathology, imaging                                    |
| Van Thiel <i>et al.</i> <sup>35</sup> | 2004 | USA       | Retrospective | 100           | Overall: 0.70 [0.46–0.88]                            | Overall: 0.94 [0.86–0.98]                            | Pathology                                             |
| Trinchet <i>et al.</i> <sup>36</sup>  | 2011 | France    | Prospective   | 638           | Early: 0.75 [0.65–0.83]                              | Early: 0.83 [0.81–0.85]                              | Pathology, CT, MRI, arteriography                     |
| Chang <i>et al.</i> <sup>37</sup>     | 2015 | Taiwan    | Retrospective | 1,597         | Overall: 0.99                                        | Overall: 0.60                                        | Pathology, CT, MRI                                    |
| Kim <i>et al.</i> <sup>38</sup>       | 2016 | Korea     | Prospective   | 407           | Early: 0.33 [0.20–0.50]<br>Overall: 0.40 [0.25–0.56] | Early: 0.88 [0.84–0.91]<br>Overall: 0.90 [0.87–0.93] | Pathology, CT                                         |
| Atiq <i>et al.</i> <sup>39</sup>      | 2017 | USA       | Retrospective | 680           | Early: 0.78<br>Overall: 0.62                         | Overall: 0.69                                        | ICD-9 with adjudication according to AASLD guidelines |

The inclusion criteria were: (1) conducted exclusively on cirrhotic patients; (2) provided data on imaging performance; (3) enough data to generate a 2 by 2 contingency table. AFP, alpha-fetoprotein; HCC, hepatocellular carcinoma; CI, confidence interval; CT, computed tomography; MRI, magnetic resonance imaging; ICD-9, International Classification of Diseases, Ninth Revision; AASLD, American Association for the Study of Liver Diseases.

**Supplementary Table 3.** Included Studies in the Systematic Review and Meta-Analysis of the Performance of aMRI in the Diagnosis of Early and Overall HCC

| Study                                   | Year | Country   | Study type    | Population, n | Sensitivity (95% CI)                                                           | Specificity (95% CI)      | Reference standard             | aMRI protocols                |
|-----------------------------------------|------|-----------|---------------|---------------|--------------------------------------------------------------------------------|---------------------------|--------------------------------|-------------------------------|
| Park <i>et al.</i> <sup>40</sup>        | 2020 | Korea     | Prospective   | 382           | Early: 0.72 [0.56–0.85]<br>Late: 1.00 [0.63–1.00]<br>Overall: 0.77 [0.64–0.89] | Overall: 0.98 [0.97–0.99] | Pathology, CE-CT               | T2-weighted, DWI              |
| Park <i>et al.</i> <sup>41</sup>        | 2020 | Korea     | Retrospective | 45            | Early: 0.85 [0.75–0.93]                                                        | Early: 0.90 [0.82–0.96]   | Pathology, full diagnostic MRI | T2-weighted, DWI, GRE         |
| Viotti Vioi <i>et al.</i> <sup>42</sup> | 2020 | USA       | Retrospective | 237           | Overall: 0.62 [0.32–0.86]                                                      | Overall: 0.96 [0.92–0.98] | Pathology, full diagnostic MRI | T2-weighted, DWI              |
| Chan <i>et al.</i> <sup>43</sup>        | 2019 | Australia | Retrospective | 188           | Overall: 0.86 [0.75–0.94]                                                      | Overall: 0.86 [0.76–0.93] | Full diagnostic MRI            | T1-weighted, T2-weighted, DWI |
| Besa <i>et al.</i> <sup>44</sup>        | 2017 | USA       | Retrospective | 174           | Overall: 0.82 [0.71–0.90]                                                      | Overall: 0.93 [0.86–0.97] | Pathology                      | DWI                           |
| Jalli <i>et al.</i> <sup>45</sup>       | 2015 | Iran      | Retrospective | 96            | Overall: 0.83 [0.65–0.94]                                                      | Overall: 1.00 [0.95–1.00] | Pathology, full diagnostic MRI | T1-weighted, T2-weighted, DWI |
| Park <i>et al.</i> <sup>46</sup>        | 2012 | Korea     | Retrospective | 260           | Early: 0.79 [0.72–0.85]                                                        | Early: 0.97               | Pathology                      | T1-weighted, T2-weighted, DWI |
| Vandecaveye <i>et al.</i> <sup>47</sup> | 2009 | Belgium   | Prospective   | 55            | Early: 0.91 [0.76–0.98]<br>Late: 1.00<br>Overall: 0.95 [0.87–0.99]             | Overall: 0.83 [0.70–0.92] | Pathology, full diagnostic MRI | DWI                           |

The inclusion criteria were: [1] conducted exclusively on cirrhotic patients; [2] provided data on imaging performance; [3] enough data to generate a 2 by 2 contingency table.

aMRI, abbreviated magnetic resonance imaging; HCC, hepatocellular carcinoma; CI, confidence interval; CE-CT, contrast-enhanced computed tomography; DWI, diffusion-weighted imaging; GRE, gradient echo sequences.

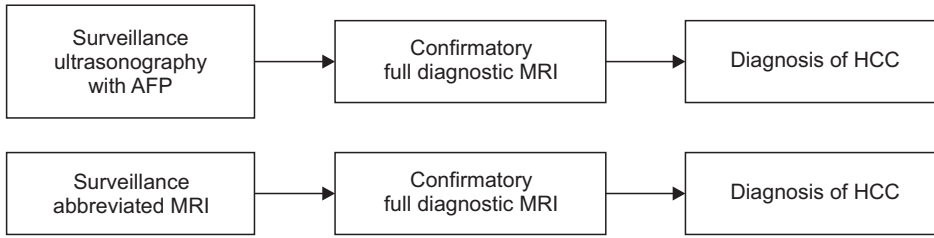

**Supplementary Fig. 1.** HCC surveillance protocols. AFP, alpha-fetoprotein; MRI, magnetic resonance imaging; HCC, hepatocellular carcinoma.

**A**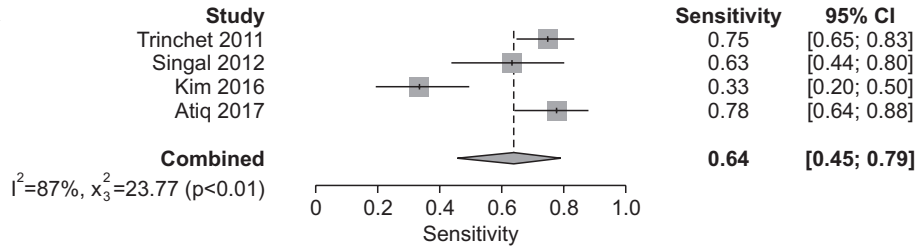**B**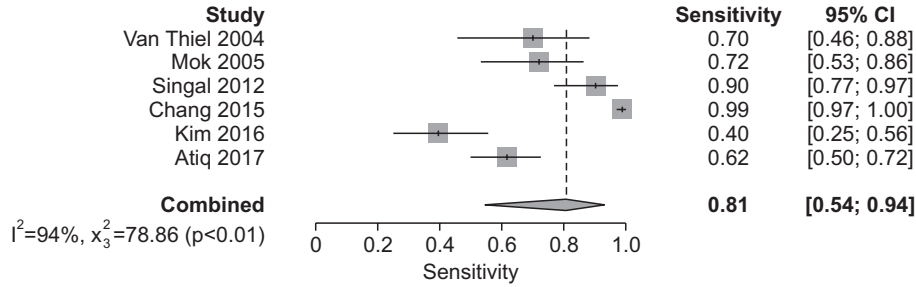**C**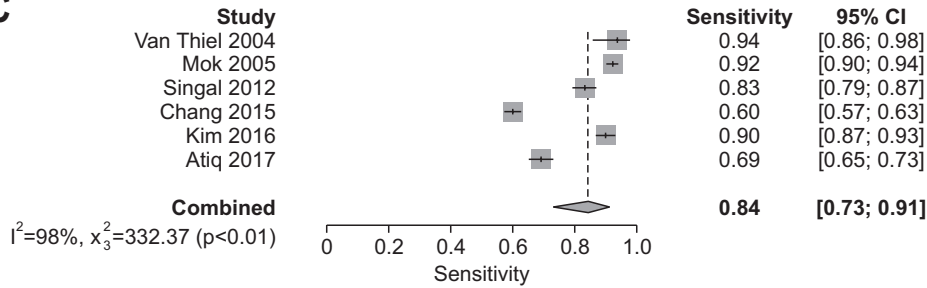

**Supplementary Fig. 2.** Sensitivity of ultrasonography with alpha-fetoprotein for early hepatocellular carcinoma diagnosis (A), overall hepatocellular carcinoma diagnosis (B), and overall specificity (C). CI, confidence interval.

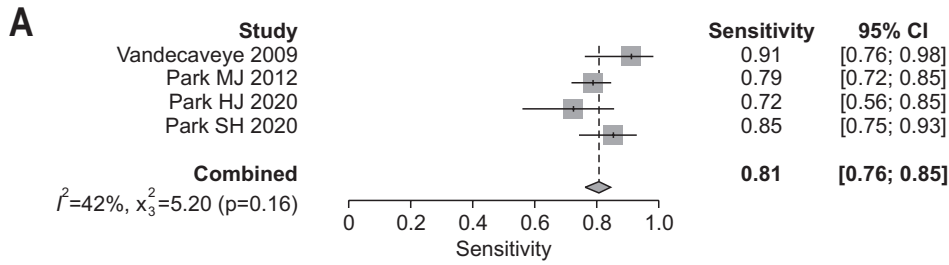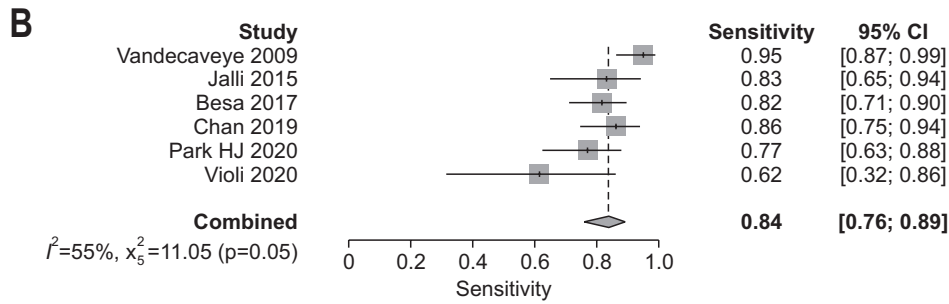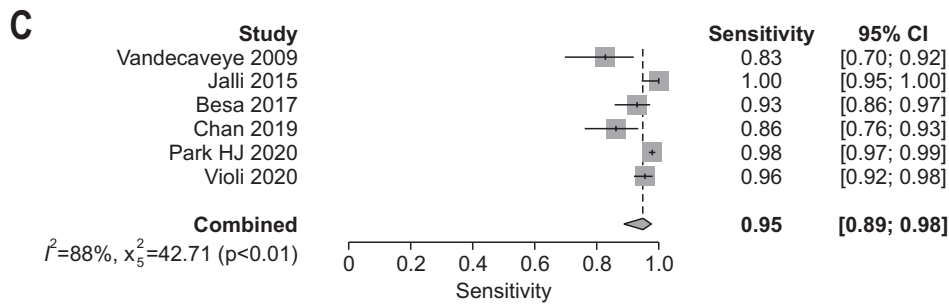

**Supplementary Fig. 3.** Sensitivity of abbreviated magnetic resonance imaging for early hepatocellular carcinoma diagnosis (A), overall hepatocellular carcinoma diagnosis (B), and overall specificity (C). CI, confidence interval.

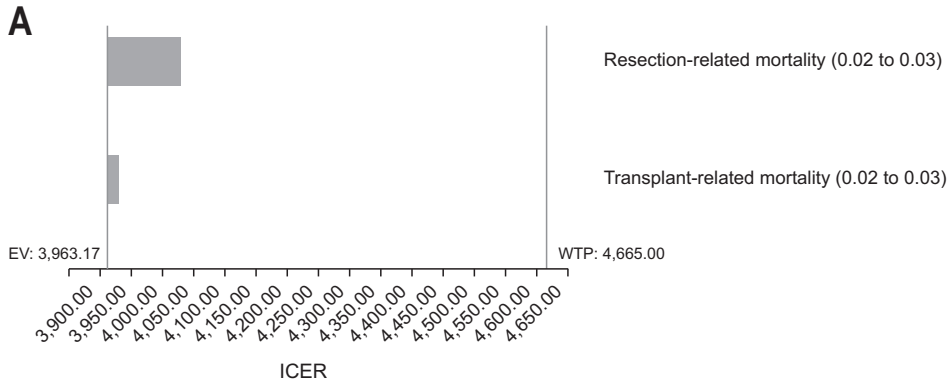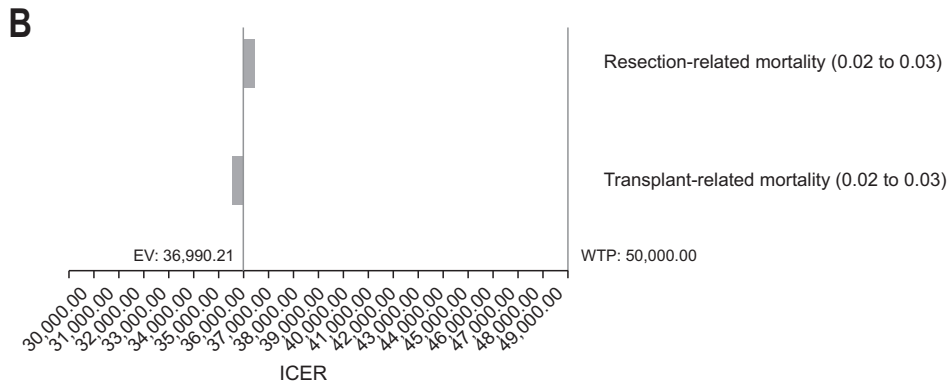

**Supplementary Fig. 4.** Tornado diagram of the sensitivity analysis for treatment-related mortality rates (2% to 3% for resection and transplantation) in the Thailand setting (A) and U.S. setting (B). EV, expected value; ICER, incremental cost-effectiveness ratio; WTP, willingness-to-pay.



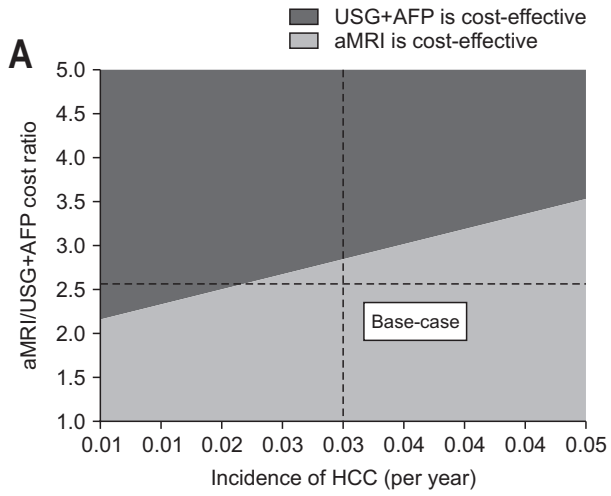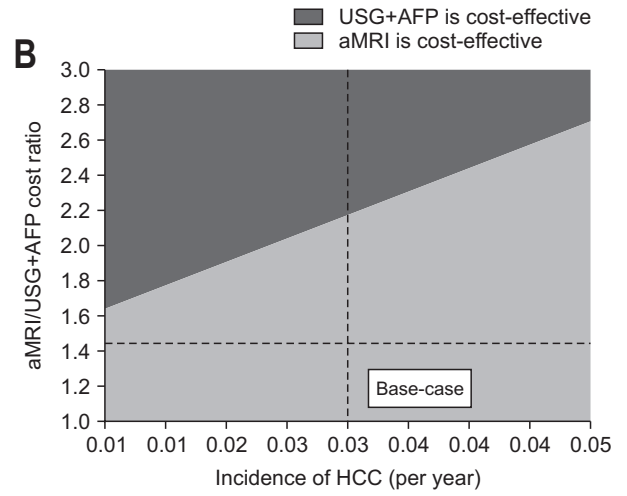

**Supplementary Fig. 5.** Two-way sensitivity analysis for HCC incidence and aMRI/USG with AFP cost ratio in Thailand setting (A) and the U.S. setting (B). The intersection between dash lines represents base-case results. HCC, hepatocellular carcinoma; aMRI, abbreviated magnetic resonance imaging; USG, ultrasonography; AFP, alpha-fetoprotein.

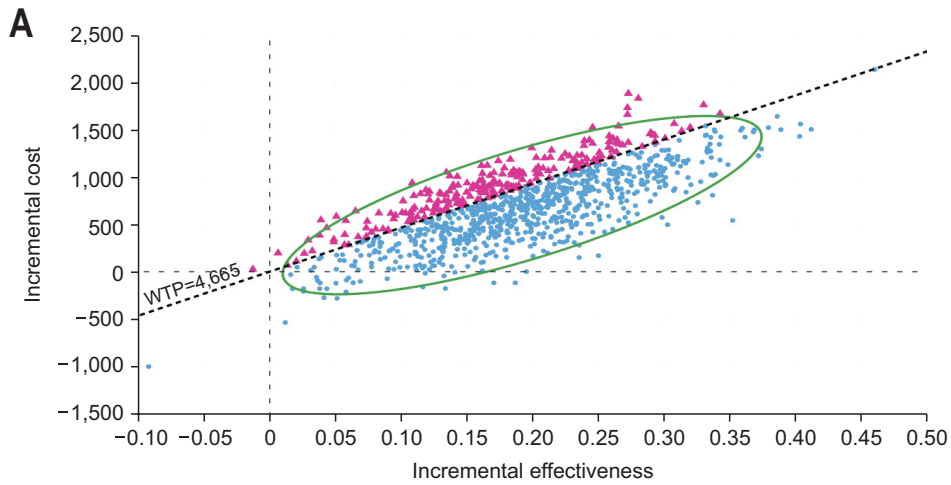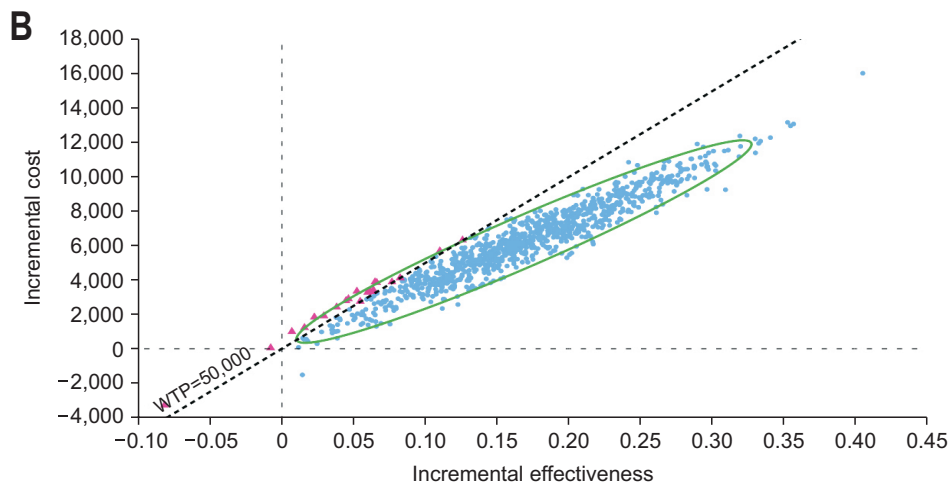

**Supplementary Fig. 6.** Scatter plot of probabilistic sensitivity analyses. Scatter plot of probabilistic sensitivity analyses of 1,000 repeated analyses comparing aMRI with combined USG and AFP in Thailand (A) and the United States (B). Blue circles represent iterations in which aMRI is the optimal strategy (superior or cost-effective) and magenta squares represent iterations in which USG with AFP is the optimal strategy. In Thailand, aMRI was the optimal strategy in 773 iterations (superior to USG with AFP in 26 iterations and cost-effective in 747 iterations). USG with AFP was the optimal strategy in 227 iterations (superior to aMRI in 1 iteration and cost-effective in 226 iterations). In the United States, aMRI was the optimal strategy in 979 iterations (superior to USG with AFP in 1 iteration and cost-effective in 978 iterations). USG with AFP was the optimal strategy in 21 iterations (superior to aMRI in 1 iteration and cost-effective in 20 iterations). aMRI, abbreviated magnetic resonance imaging; USG, ultrasonography; AFP, alpha-fetoprotein; WTP, willingness-to-pay.

## REFERENCES

1. Chirapongsathorn S, Poovorawan K, Soonthornworasiri N, et al. Health care burden and mortality of acute on chronic liver failure in Thailand: a nationwide population-based cohort study. *BMC Health Serv Res* 2022;22:156.
2. Parikh ND, Singal AG, Hutton DW, Tapper EB. Cost-effectiveness of hepatocellular carcinoma surveillance: an assessment of benefits and harms. *Am J Gastroenterol* 2020;115:1642-1649.
3. Thongsawat S, Piratvisuth T, Pramoolsinsap C, Chutaputti A, Tanwandee T, Thongsuk D. Resource utilization and direct medical costs of chronic hepatitis C in Thailand: a heavy but manageable economic burden. *Value Health Reg Issues* 2014;3:12-18.
4. Rattanavipapong W, Anothaisintawee T, Teerawattananon Y. Revisiting policy on chronic HCV treatment under the Thai Universal Health Coverage: an economic evaluation and budget impact analysis. *PLoS One* 2018;13:e0193112.
5. Park JW, Chen M, Colombo M, et al. Global patterns of hepatocellular carcinoma management from diagnosis to death: the BRIDGE Study. *Liver Int* 2015;35:2155-2166.
6. Cabrera R, Singal AG, Colombo M, et al. A real-world observational cohort of patients with hepatocellular carcinoma: design and rationale for TARGET-HCC. *Hepatol Commun* 2020;5:538-547.
7. Kanwal F, Befeler A, Chari RS, et al. Potentially curative treatment in patients with hepatocellular cancer: results from the liver cancer research network. *Aliment Pharmacol Ther* 2012;36:257-265.
8. Kuo KL, Stenhjem D, Albright F, Ray S, Brixner D. Treatment patterns and outcomes in patients with hepatocellular carcinoma stratified by stage-guided treatment categories. *J Natl Compr Canc Netw* 2015;13:987-994.
9. Cosgrove D, Tan A, Hernandez S, et al. Atezolizumab plus bevacizumab in patients with hepatocellular carcinoma (HCC): real-world experience from a US community oncology network. Paper presented at: 2022 AASLD The Liver Meeting; 2022 Nov 4; Washington, USA.
10. Klink AJ, Marshall LZ, Aly A, Seal B, Healey MJ, Feinberg B. Real-world treatment patterns and reasons for therapy selection in patients with advanced hepatocellular carcinoma in US oncology practices. *Oncologist* 2022;27:e265-e272.
11. Mospan AR, Morris HL, Fried MW. Real-world evidence in hepatocellular carcinoma. *Liver Int* 2021;41 Suppl 1:61-67.
12. D'Amico G, Garcia-Tsao G, Pagliaro L. Natural history and prognostic indicators of survival in cirrhosis: a systematic review of 118 studies. *J Hepatol* 2006;44:217-231.
13. Fattovich G, Stroffolini T, Zagni I, Donato F. Hepatocellular carcinoma in cirrhosis: incidence and risk factors. *Gastroenterology* 2004;127(5 Suppl 1):S35-S50.
14. Sakamaki A, Takamura M, Sakai N, et al. Longitudinal increase in albumin-bilirubin score is associated with non-malignancy-related mortality and quality of life in patients with liver cirrhosis. *PLoS One* 2022;17:e0263464.
15. World Health Organization (WHO). WHO Mortality Database [Internet]. Geneva: WHO; c2022 [cited year mo day]. Available from: <https://www.who.int/data/data-collection-tools/who-mortality-database>
16. Wang J, Zhang Z, Yan X, et al. Albumin-Bilirubin (ALBI) as an accurate and simple prognostic score for chronic hepatitis B-related liver cirrhosis. *Dig Liver Dis* 2019;51:1172-1178.
17. Lin OS, Keeffe EB, Sanders GD, Owens DK. Cost-effectiveness of screening for hepatocellular carcinoma in patients with cirrhosis due to chronic hepatitis C. *Aliment Pharmacol Ther* 2004;19:1159-1172.
18. Kornberg A, Witt U, Schernhammer M, et al. The role of preoperative albumin-bilirubin grade for oncological risk stratification in liver transplant patients with hepatocellular carcinoma. *J Surg Oncol* 2019;120:1126-1136.
19. Cho WR, Hung CH, Chen CH, et al. Ability of the post-operative ALBI grade to predict the outcomes of hepatocellular carcinoma after curative surgery. *Sci Rep* 2020;10:7290.
20. Kao WY, Su CW, Chiou YY, et al. Hepatocellular carcinoma: nomograms based on the albumin-bilirubin grade to assess the outcomes of radiofrequency ablation. *Radiology* 2017;285:670-680.
21. Ho SY, Hsu CY, Liu PH, et al. Albumin-bilirubin (ALBI) grade-based nomogram for patients with hepatocellular carcinoma undergoing transarterial chemoembolization. *Dig Dis Sci* 2021;66:1730-1738.
22. Antkowiak M, Gabr A, Das A, et al. Prognostic role of albumin, bilirubin, and ALBI scores: analysis of 1000 patients with hepatocellular carcinoma undergoing radioembolization. *Cancers (Basel)* 2019;11:879.
23. Su TS, Yang HM, Zhou Y, et al. Albumin - bilirubin (ALBI) versus Child-Turcotte-Pugh (CTP) in prognosis of HCC after stereotactic body radiation therapy. *Radiat Oncol* 2019;14:50.
24. Edeline J, Blanc JF, Johnson P, et al. A multicentre comparison between Child Pugh and Albumin-Bilirubin scores in patients treated with sorafenib for hepatocellular carcinoma. *Liver Int* 2016;36:1821-1828.
25. Kudo M, Finn RS, Qin S, et al. Lenvatinib versus sorafenib in first-line treatment of patients with unresectable hepatocellular carcinoma.

- noma: a randomised phase 3 non-inferiority trial. *Lancet* 2018;391:1163-1173.
26. Finn RS, Qin S, Ikeda M, et al. Atezolizumab plus bevacizumab in unresectable hepatocellular carcinoma. *N Engl J Med* 2020;382:1894-1905.
  27. Cheng AL, Qin S, Ikeda M, et al. Updated efficacy and safety data from IMbrave150: atezolizumab plus bevacizumab vs. sorafenib for unresectable hepatocellular carcinoma. *J Hepatol* 2022;76:862-873.
  28. Chen PC, Chiu NC, Su CW, et al. Albumin-bilirubin grade may determine the outcomes of patients with very early stage hepatocellular carcinoma after radiofrequency ablation therapy. *J Chin Med Assoc* 2019;82:2-10.
  29. Kim JW, Kim JH, Sung KB, et al. Transarterial chemoembolization vs. radiofrequency ablation for the treatment of single hepatocellular carcinoma 2 cm or smaller. *Am J Gastroenterol* 2014;109:1234-1240.
  30. Dhondt E, Lambert B, Hermie L, et al. 90Y radioembolization versus drug-eluting bead chemoembolization for unresectable hepatocellular carcinoma: results from the TRACE Phase II Randomized Controlled Trial. *Radiology* 2022;303:699-710.
  31. Baumann BC, Wei J, Plastaras JP, et al. Stereotactic body radiation therapy (SBRT) for hepatocellular carcinoma: high rates of local control with low toxicity. *Am J Clin Oncol* 2018;41:1118-1124.
  32. Joliat GR, Allemann P, Labgaa I, Demartines N, Halkic N. Treatment and outcomes of recurrent hepatocellular carcinomas. *Langenbecks Arch Surg* 2017;402:737-744.
  33. Mok TS, Yeo W, Yu S, et al. An intensive surveillance program detected a high incidence of hepatocellular carcinoma among hepatitis B virus carriers with abnormal alpha-fetoprotein levels or abdominal ultrasonography results. *J Clin Oncol* 2005;23:8041-8047.
  34. Singal AG, Conjeevaram HS, Volk ML, et al. Effectiveness of hepatocellular carcinoma surveillance in patients with cirrhosis. *Cancer Epidemiol Biomarkers Prev* 2012;21:793-799.
  35. Van Thiel DH, Yong S, Li SD, Kennedy M, Brems J. The development of de novo hepatocellular carcinoma in patients on a liver transplant list: frequency, size, and assessment of current screening methods. *Liver Transpl* 2004;10:631-637.
  36. Trinchet JC, Chaffaut C, Bourcier V, et al. Ultrasonographic surveillance of hepatocellular carcinoma in cirrhosis: a randomized trial comparing 3- and 6-month periodicities. *Hepatology* 2011;54:1987-1997.
  37. Chang TS, Wu YC, Tung SY, et al. Alpha-fetoprotein measurement benefits hepatocellular carcinoma surveillance in patients with cirrhosis. *Am J Gastroenterol* 2015;110:836-844.
  38. Kim SY, An J, Lim YS, et al. MRI with liver-specific contrast for surveillance of patients with cirrhosis at high risk of hepatocellular carcinoma. *JAMA Oncol* 2017;3:456-463.
  39. Atiq O, Tiro J, Yopp AC, et al. An assessment of benefits and harms of hepatocellular carcinoma surveillance in patients with cirrhosis. *Hepatology* 2017;65:1196-1205.
  40. Park HJ, Jang HY, Kim SY, et al. Non-enhanced magnetic resonance imaging as a surveillance tool for hepatocellular carcinoma: comparison with ultrasound. *J Hepatol* 2020;72:718-724.
  41. Park SH, Kim B, Kim SY, et al. Characterizing computed tomography-detected arterial hyperenhancing-only lesions in patients at risk of hepatocellular carcinoma: can non-contrast magnetic resonance imaging be used for sequential imaging? *Korean J Radiol* 2020;21:280-289.
  42. Vietti Violi N, Lewis S, Liao J, et al. Gadoxetate-enhanced abbreviated MRI is highly accurate for hepatocellular carcinoma screening. *Eur Radiol* 2020;30:6003-6013.
  43. Chan MV, McDonald SJ, Ong YY, et al. HCC screening: assessment of an abbreviated non-contrast MRI protocol. *Eur Radiol Exp* 2019;3:49.
  44. Besa C, Lewis S, Pandharipande PV, et al. Hepatocellular carcinoma detection: diagnostic performance of a simulated abbreviated MRI protocol combining diffusion-weighted and T1-weighted imaging at the delayed phase post gadoxetic acid. *Abdom Radiol (NY)* 2017;42:179-190.
  45. Jalli R, Jafari SH, Sefidbakht S, Kazemi K. Comparison of the accuracy of DWI and ultrasonography in screening hepatocellular carcinoma in patients with chronic liver disease. *Iran J Radiol* 2015;12:e12708.
  46. Park MJ, Kim YK, Lee MW, et al. Small hepatocellular carcinomas: improved sensitivity by combining gadoxetic acid-enhanced and diffusion-weighted MR imaging patterns. *Radiology* 2012;264:761-770.
  47. Vandecaveye V, De Keyzer F, Verslype C, et al. Diffusion-weighted MRI provides additional value to conventional dynamic contrast-enhanced MRI for detection of hepatocellular carcinoma. *Eur Radiol* 2009;19:2456-2466.
